# Supplementary material for: Combinatorial microneedle patch with tunable release kinetics and dual fast-deep/sustained release capabilities
Source: Royal Society of Chemistry journal article supplement (doi:10.1039/d1tb00141h), 2021-01-01
Supplement: d1tb00141h1.pdf [file d1tb00141h1.pdf]

## Supporting Information

# Combinatorial microneedle patch with tunable release kinetics and dual fast-deep/sustained release capabilities

Miguel Angel Lopez-Ramirez,<sup>a</sup> Daniel Kupor,<sup>a</sup> Leonardo Marchiori,<sup>a</sup> Fernando Soto,<sup>a</sup> Ricardo Rueda,<sup>a</sup> Maria Reynoso,<sup>a</sup> Lakshmi Rekha Narra,<sup>b</sup> Krishnan Chakravarthy<sup>\*a,b</sup> and Joseph Wang<sup>\*a</sup>

<sup>a</sup> Department of Nanoengineering, University of California, San Diego, La Jolla, California 92093, United States.

<sup>b</sup> Department of Anesthesiology and Pain Medicine, University of California, San Diego, Health Sciences, La Jolla, California, 92093, United States.

\* Correspondence to: [kvchakravarthy@health.ucsd.edu](mailto:kvchakravarthy@health.ucsd.edu) and [josephwang@ucsd.edu](mailto:josephwang@ucsd.edu)

### Supporting Tables

**Table S1.** Lithographic 3D printing parameters of MN arrays: variable layer thickness.

**Table S2.** Lithographic 3D printing parameters of MN arrays: variable angle.

**Table S3.** PDMS micromolding and post curing parameters.

### Supporting Figures

**Fig. S1** Lithographic 3D printed MNs.

**Fig. S2** Lithographic 3D printed MN tip sharpness.

**Fig. S3** Heat exchange (temperature change) from Mg microparticles

**Fig. S4** UV-vis absorbance curves of the release of combinatorial MN patches.

**Fig. S5** PLGA microparticle sustained release approach.

**Fig. S6** Sustained release MN detachment from the base of the patch

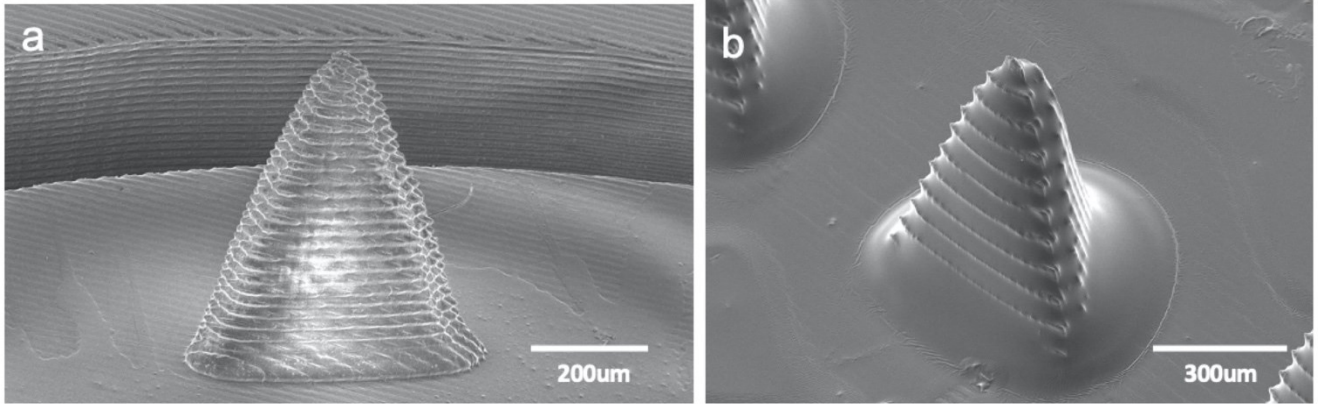

**Fig. S1** Lithographic 3D printed MN master arrays fabricated via mask photolithography: (a) 20  $\mu\text{m}$  layers, (b) 50  $\mu\text{m}$  layers, both printed at an angle of 0 deg (no supports).

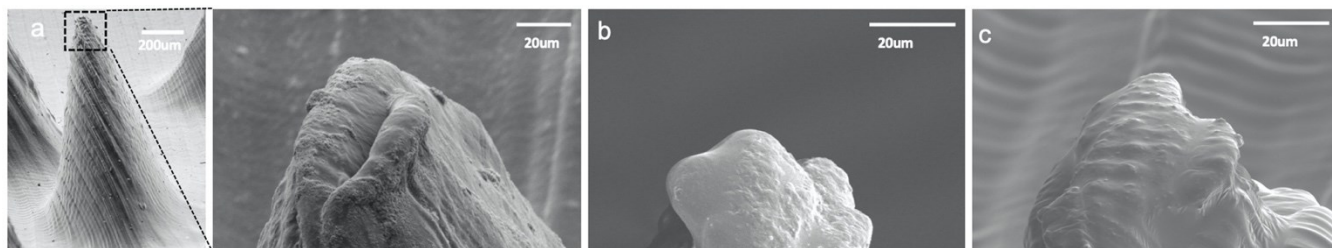

**Fig. S2** Lithographic 3D printed MN tip sharpness (20 μm layer thickness): (a) support angle 55 deg, (b) support angle 45 deg, (c) support angle 30 deg.

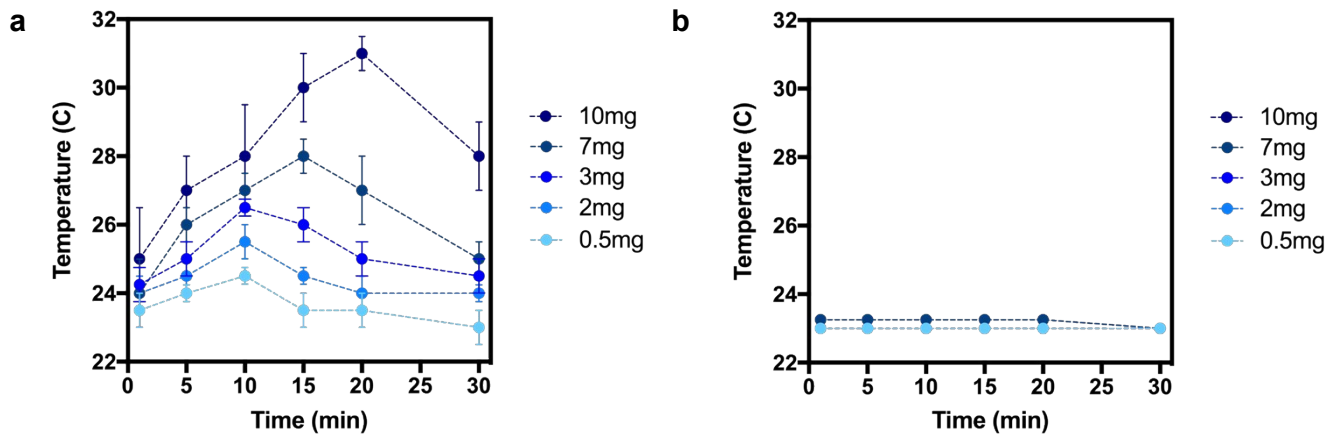

**Fig. S3** Heat exchange (temperature change) from different amount of Mg microparticles (0.5, 2, 3, 7, and 10 mg) in 300 $\mu$ L of PBS solution, pH 3.0 (a) and 7.4 (b).

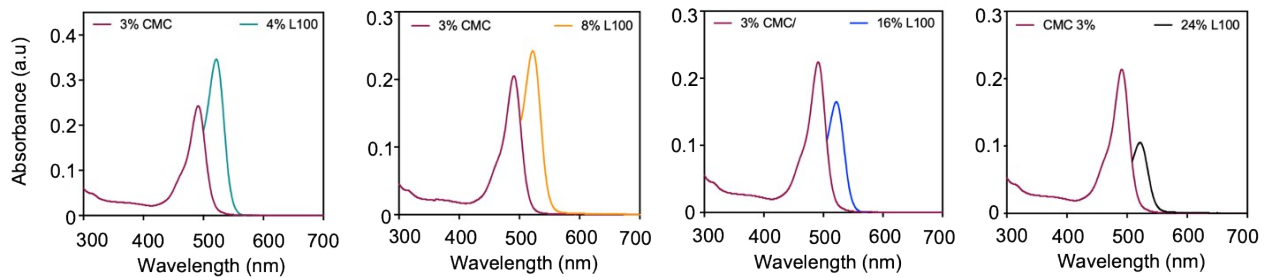

**Fig. S4** UV-vis absorbance curves of the release of combinatorial MN patches: fast acting MN compartment 3% CMC-FITC (fixed) + variable Eudragit®L100/Rh6G (4-24%)

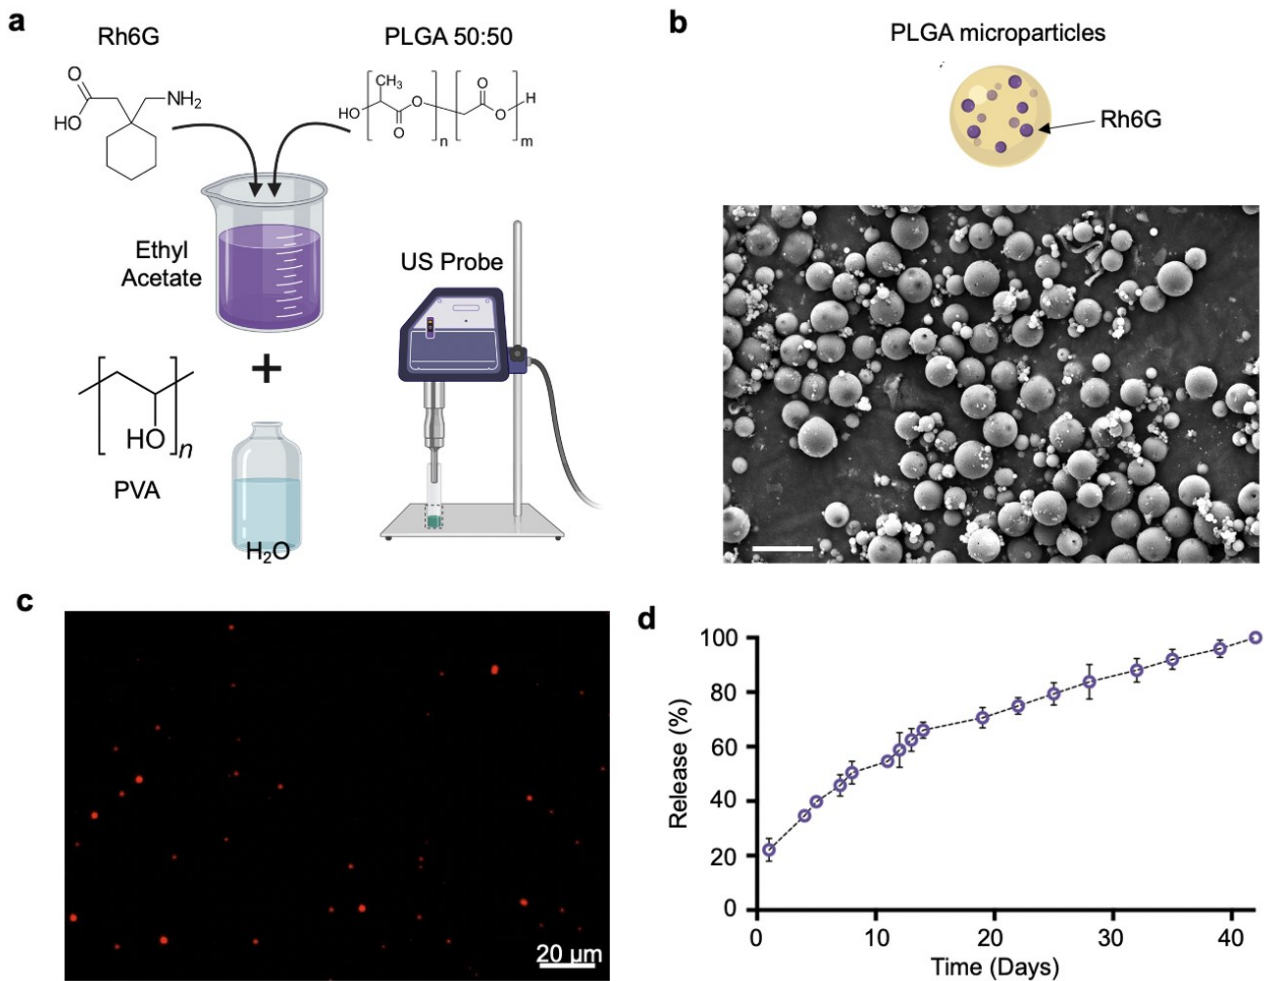

**Fig. S5** PLGA microparticle sustained release approach. (a) PLGA microparticle formulation. (b) SEM of PLGA microparticles. Scale bar, 10  $\mu\text{m}$ . (c) Fluorescence microscopy image (RFP channel) of PLGA microparticles loaded with Rh6G. Scale bar, 20  $\mu\text{m}$ . (d) Cumulative release curve of Rh6G from PLGA microparticles.

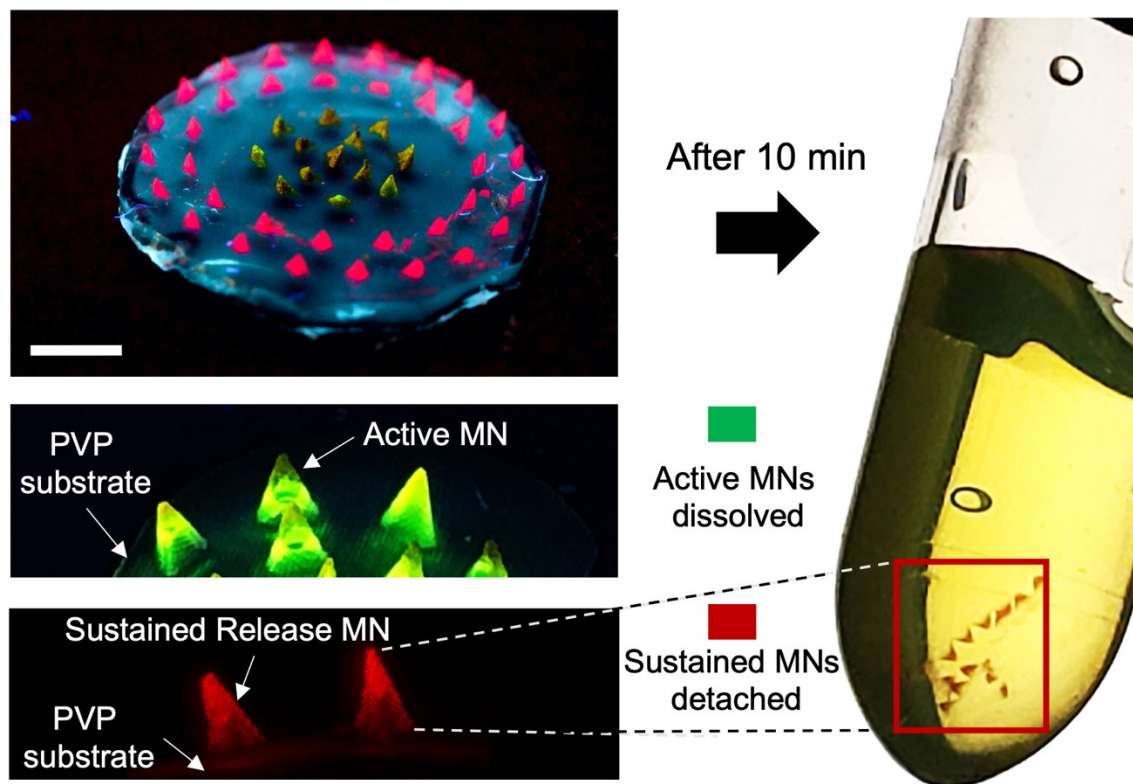

**Fig. S6** Sustained release MN detachment from the base of the patch, and “fast-acting” MN dissolution. Scale bar, 2.5mm.

**Table S1.** Lithographic 3D printing parameters of MN arrays: variable layer thickness (20-100  $\mu\text{m}$ ), no

| <b>Layer Thickness (mm)</b> | <b>Exposure Time (s)</b> | <b>Off time (s)</b> | <b>Bottom Exposure (s)</b> | <b>Bottom Layers</b> | <b>Support Angle</b> |
|-----------------------------|--------------------------|---------------------|----------------------------|----------------------|----------------------|
| 0.02                        | 10                       | 3                   | 80                         | 25                   | 0                    |
| 0.05                        | 10                       | 3                   | 80                         | 10                   | 0                    |
| 0.1                         | 10                       | 3                   | 80                         | 5                    | 0                    |

angle.



**Table S2.** Lithographic 3D printing parameters of MN arrays: variable angle (30-55 deg) with 20  $\mu\text{m}$  layer

| <b>Layer Thickness (mm)</b> | <b>Exposure Time (s)</b> | <b>Off time (s)</b> | <b>Bottom Exposure (s)</b> | <b>Bottom Layers</b> | <b>Support Angle</b> | <b>Tip Sharpness</b> |
|-----------------------------|--------------------------|---------------------|----------------------------|----------------------|----------------------|----------------------|
| 0.02                        | 10                       | 3                   | 80                         | 25                   | 55                   | $\sim 20\mu\text{m}$ |
| 0.02                        | 10                       | 3                   | 80                         | 25                   | 45                   | $\sim 20\mu\text{m}$ |
| 0.02                        | 10                       | 3                   | 80                         | 25                   | 30                   | $\sim 20\mu\text{m}$ |

thickness.

**Table S3.** PDMS micromolding and post curing parameters: temperature and UV exposure time.

| <b>3D printed mold heating (°C)</b> | <b>Exposure Time (min)</b> | <b>PDMS base:curing agent</b> | <b>PDMS curing temperature(°C)</b> | <b>PDMS curing time</b> | <b>Result</b>                 |
|-------------------------------------|----------------------------|-------------------------------|------------------------------------|-------------------------|-------------------------------|
| 120                                 | 3                          | 84:16                         | 85                                 | 30 min                  | PDMS Curing Process Inhibited |
| 120                                 | 5                          | 84:16                         | 85                                 | 30 min                  | -                             |
| 120                                 | 10                         | 84:16                         | 85                                 | 30 min                  | -                             |
| 120                                 | 15                         | 84:16                         | 85                                 | 30 min                  | -                             |
| 120                                 | 20                         | 84:16                         | 85                                 | 30 min                  | Mold cured correctly          |
| 120                                 | 25                         | 84:16                         | 85                                 | 30 min                  | +                             |
| 120                                 | 30                         | 84:16                         | 85                                 | 30 min                  | +                             |
| 120                                 | 30                         | 84:16                         | Room Temperature                   | 24 hours                | +                             |
